# Comparison of the Fecal Microbiota of Healthy Horses and Horses with Colitis by High Throughput Sequencing of the V3-V5 Region of the 16S rRNA Gene

Marcio C. Costa<sup>1\*</sup>, Luis G. Arroyo<sup>2</sup>, Emma Allen-Vercoe<sup>3</sup>, Henry R. Stämpfli<sup>2</sup>, Peter T. Kim<sup>4</sup>, Amy Sturgeon<sup>1</sup>, J. Scott Weese<sup>1</sup>

**1** Department of Pathobiology, Ontario Veterinary College, University of Guelph, Guelph, Ontario, Canada, **2** Department of Clinical Studies, Ontario Veterinary College, University of Guelph, Guelph, Ontario, Canada, **3** Department of Molecular and Cellular Biology, College of Biological Sciences, University of Guelph, Guelph, Ontario, Canada, **4** Department of Mathematics and Statistics, College of Physical and Engineering Science, University of Guelph, Guelph, Ontario, Canada

## Abstract

The intestinal tract houses one of the richest and most complex microbial populations on the planet, and plays a critical role in health and a wide range of diseases. Limited studies using new sequencing technologies in horses are available. The objective of this study was to characterize the fecal microbiome of healthy horses and to compare the fecal microbiome of healthy horses to that of horses with undifferentiated colitis. A total of 195,748 sequences obtained from 6 healthy horses and 10 horses affected by undifferentiated colitis were analyzed. Firmicutes predominated (68%) among healthy horses followed by Bacteroidetes (14%) and Proteobacteria (10%). In contrast, Bacteroidetes (40%) was the most abundant phylum among horses with colitis, followed by Firmicutes (30%) and Proteobacteria (18%). Healthy horses had a significantly higher relative abundance of Actinobacteria and Spirochaetes while horses with colitis had significantly more Fusobacteria. Members of the *Clostridia* class were more abundant in healthy horses. Members of the Lachnospiraceae family were the most frequently shared among healthy individuals. The species richness reported here indicates the complexity of the equine intestinal microbiome. The predominance of Clostridia demonstrates the importance of this group of bacteria in healthy horses. The marked differences in the microbiome between healthy horses and horses with colitis indicate that colitis may be a disease of gut dysbiosis, rather than one that occurs simply through overgrowth of an individual pathogen.

**Citation:** Costa MC, Arroyo LG, Allen-Vercoe E, Stämpfli HR, Kim PT, et al. (2012) Comparison of the Fecal Microbiota of Healthy Horses and Horses with Colitis by High Throughput Sequencing of the V3-V5 Region of the 16S rRNA Gene. PLoS ONE 7(7): e41484. doi:10.1371/journal.pone.0041484

**Editor:** Georgina L. Hold, University of Aberdeen, United Kingdom

**Received:** March 22, 2012; **Accepted:** June 21, 2012; **Published:** July 31, 2012

**Copyright:** © 2012 Costa et al. This is an open-access article distributed under the terms of the Creative Commons Attribution License, which permits unrestricted use, distribution, and reproduction in any medium, provided the original author and source are credited.

**Funding:** This work was supported by Equine Guelph. The funders had no role in study design, data collection and analysis, decision to publish, or preparation of the manuscript.

**Competing Interests:** The authors have declared that no competing interests exist.

\* E-mail: costamc@gmail.com

## Introduction

The intestinal tract contains one of the most dense, dynamic and complex bacterial populations (microbiomes) of any environment on the planet. It has been called the ‘2<sup>nd</sup> genome’ in testament to its size and complexity. In humans, it is believed that the intestinal microbiome contains up to 1000 different species and approximately 10<sup>12</sup> bacteria/gram of feces [1].

The large intestine of the horse is an anaerobic fermentative chamber where fibrolytic bacteria produce short chain fatty acids that account for most of the horse’s energy requirements [2,3]. A properly functioning intestinal tract and microbiome is critical for maintenance of normal health. The homeostatic balance in the equine intestinal microbiome is very sensitive to factors like gastrointestinal disease and dietary change, which may lead to catastrophic consequences, even culminating in death [4,5]. Indeed, diseases affecting the gastro-intestinal system are the main cause of mortality in this species [4]. Yet, despite the clear importance of the intestinal microbiome, our understanding of what constitutes ‘normal’ and ‘abnormal’ is to date very limited.

Colitis in horses can be associated with a variety of infectious agents such as *Clostridium difficile*, *Salmonella* spp., *Clostridium*

*perfringens* and *Neorickettsia risticii* [5,6]. In most cases, the etiologic agent(s) remain(s) undetermined; however, disruption of the normal microbiome is likely a key factor in most cases of colitis. Accordingly, characterization of the equine intestinal microbiome is critical, since a good understanding of the ‘normal’ intestinal microbiome is needed for interpretation of ‘abnormal’. Most investigations of the equine microbiome have typically involved bacterial culture of feces or intestinal contents. However, culture based methods only allow for superficial assessment of the components of the microbiome, which is a significant limitation, as a large component of the microbiome is thought to consist of unknown or unculturable microorganisms [7,8]. Therefore, molecular approaches are required in order to analyze bacterial diversity in fecal samples. The development of next generation sequencing has led to a revolution in characterization of complex microbial populations, and opened new doors to the understanding of disease pathophysiology and to the development of new treatment approaches. The objectives of this study were to characterize the fecal microbiome of healthy horses and compare to that of horses with undifferentiated colitis.

## Results

### Metrics

The total number of reads, number of base pairs and the mean length of the reads obtained from the original fasta file of each fecal sample before and after quality control filters are presented in Table 1. The total number of reads after pyrosequencing noise, and chimera removal are shown in Table 2, along with kingdom-level identification. A total of 135,803 reads were classified as Bacteria and therefore used for calculation of relative abundance. The rarefaction curves generated by MOTHUR plotting the number of reads by the number of operational taxonomic units (OTUs) indicates that using 4712 reads per sample (the minimum number of sequences passing all quality control measures across the samples) for the final analysis was adequate since increasing the number of reads beyond that value had minimal impact on number of OTUs (Figure 1).

### Relative Abundances

Bacteria phyla representing more than 1% of total reads are presented in Table 3. In healthy horses, Firmicutes predominated (68.1%) followed by Bacteroidetes (14.2%) and Proteobacteria (10.2%). Interestingly, the high overall abundance of Proteobacteria in healthy horses (Figure 2a) was due to predominantly to horses 1 and 2, who had very high relative abundances of this phylum. *Acinetobacter* was the most common genus in those horses, while *Lysinibacillus*, *Carnobacterium* (2 horses) and *Bacillus* were the predominant genera in the other healthy horses.

Bacteroidetes was the most prevalent phylum among horses with colitis accounting for 40.0% of reads, followed by Firmicutes

(30.3%) and Proteobacteria (18.7%). *Clostridium*, *Enterococcus*, *Prevotella* (2 horses) *Coptotermes*, *Porphyromonas* (2 horses), *Pseudomonas* (2 horses) and *Fusobacterium* were the most common genera. Data variation within each phylum in the two groups of horses is presented in Figure 2b.

The abundance of Firmicutes or Bacteroidetes was not statistically different between the groups ( $P=0.086$  and  $P=0.091$ , respectively). However, the abundance of Actinobacteria and Spirochaetes was significantly higher among healthy horses ( $P=0.002$ ) and abundance of Fusobacteria was higher among horses with colitis ( $P=0.009$ ). *Fusobacterium necrophorum*, *F. nucleatum* and *F. equinum* were the most common Fusobacteria in horses with colitis, with significantly greater abundance of *F. necrophorum* and *F. nucleatum* compared to normal horses ( $P=0.015$  and,  $P=0.028$ , respectively). Clostridia was the only class significantly different between groups ( $P=0.019$ ), with greater abundance in healthy horses. Similarly, the abundance of the order Clostridiales was significantly higher in healthy horses ( $P=0.018$ ). Several families accounted for this difference including Heliobacteriaceae ( $P=0.0001$ ), Lachnospiraceae ( $P=0.003$ ), Eubacteriaceae ( $P=0.008$ ), Peptococcaceae ( $P=0.012$ ), Clostridiaceae ( $P=0.035$ ) and Ruminococcaceae ( $P=0.044$ ). Among Clostridiaceae, *Trepidimicrobium* ( $P<0.0001$ ) and *Clostridium* ( $P=0.039$ ) were the genera more frequently found in healthy horses (11% of sequences) when compared to horses with colitis (5.5%). The Order *Lactobacillales*, which comprises the lactic acid bacteria, was not significantly different between groups ( $P=0.990$ ). The genus *Lactobacillus* was found more frequently in horses with colitis, however, this difference was not statistically significant ( $P=0.258$ ).

**Table 1.** Pyrosequencing metrics from raw data before and after standard MG-RAST quality control (QC) filters.

|            | Sequences         | Base Pairs               | Mean Length | Post QC Sequences | Post QC Base Pairs       | Post QC Mean Length |
|------------|-------------------|--------------------------|-------------|-------------------|--------------------------|---------------------|
| Healthy 1  | 8,511             | 4,427,140                | 520±51      | 8,315             | 4,383,098                | 527±16              |
| Healthy 2  | 6,579             | 3,415,612                | 519±54      | 6,356             | 3,357,920                | 528±16              |
| Healthy 3  | 21,600            | 11,236,309               | 520±66      | 2,313             | 1,242,651                | 537±21              |
| Healthy 4  | 16,573            | 8,694,983                | 524±51      | 16,292            | 8,644,714                | 530±15              |
| Healthy 5  | 6,552             | 3,471,194                | 529±37      | 6,473             | 3,449,816                | 532±16              |
| Healthy 6  | 17,593            | 9,238,535                | 525±60      | 17,027            | 9,107,355                | 534±15              |
| Mean (±SD) | 12,901<br>(6,491) | 6,747,296<br>(3,387,243) |             | 9,463<br>(5,914)  | 5,030,926<br>(3,154,244) |                     |
| Colitis 1  | 7,446             | 3,806,461                | 511±79      | 7,445             | 3,805,868                | 511±79              |
| Colitis 2  | 6,043             | 3,116,620                | 515±56      | 5,908             | 3,091,273                | 523±13              |
| Colitis 3  | 6,164             | 3,161,864                | 512±52      | 5,907             | 3,085,726                | 522±22              |
| Colitis 4  | 9,202             | 4,609,881                | 500±74      | 8,238             | 4,324,045                | 524±19              |
| Colitis 5  | 13,370            | 6,666,805                | 498±91      | 12,540            | 6,523,300                | 520±14              |
| Colitis 6  | 34,608            | 18,717,239               | 540±23      | 2,920             | 1,593,071                | 545±14              |
| Colitis 7  | 7,869             | 4,286,601                | 544±20      | 7,822             | 4,258,982                | 544±12              |
| Colitis 8  | 15,522            | 8,418,453                | 542±27      | 15,408            | 8,359,126                | 542±14              |
| Colitis 9  | 8,705             | 4,677,368                | 537±19      | 8,619             | 4,626,452                | 536±12              |
| Colitis 10 | 9,411             | 5,116,407                | 543±20      | 9,362             | 5,090,677                | 543±10              |
| Mean (±SD) | 11,834<br>(8,549) | 6,257,770<br>(4,665,905) |             | 8,417<br>(3,511)  | 4,475,852<br>(1,895,944) |                     |
| Total      | 195,748           | 103,061,472              |             | 140,945           | 74,944,074               |                     |

Total number of sequences, number of base pairs and the mean length of sequences (bp) present in the original fasta file before and after MG-RAST standard quality control filters. Means and standard deviations (±SD) among healthy horses and horses with colitis are also presented.

doi:10.1371/journal.pone.0041484.t001

**Table 2.** Pyrosequencing metrics of the cleaned data and its distribution at the Kingdom level.

| Horse            | After cleaning    | After filters    | Bacteria | Eukaryota | Unassigned | Unclassified seq. | Archaea |
|------------------|-------------------|------------------|----------|-----------|------------|-------------------|---------|
| Healthy 1        | 7232              | 6948             | 90.27    | 6.47      | 3.14       | 0.12              | –       |
| Healthy 2        | 5622              | 5351             | 90.92    | 7.12      | 1.89       | 0.07              | –       |
| Healthy 3        | 17725             | 19328            | 88.83    | 7.32      | 3.62       | 0.22              | 0.01    |
| Healthy 4        | 13202             | 11270            | 89.59    | 9.74      | 0.24       | 0.43              | –       |
| Healthy 5        | 4962              | 4402             | 78.10    | 13.22     | –          | 8.61              | 0.07    |
| Healthy 6        | 12872             | 12201            | 80.60    | 13.91     | 0.98       | 4.52              | –       |
| Mean ( $\pm$ SD) | 10,269<br>(5,098) | 9,917<br>(5,580) | 86.85    | 9.45      | 1.96       | 1.74              | 0.01    |
| Colitis 1        | 6259              | 5146             | 92.93    | 3.67      | 2.60       | 0.80              | –       |
| Colitis 2        | 5257              | 2996             | 98.10    | 0.53      | 1.37       | –                 | –       |
| Colitis 3        | 5219              | 4245             | 84.31    | 15.19     | 0.19       | 0.31              | –       |
| Colitis 4        | 8134              | 7031             | 72.29    | 27.04     | 0.67       | –                 | –       |
| Colitis 5        | 10669             | 9878             | 77.70    | 3.76      | 17.61      | 0.93              | –       |
| Colitis 6        | 30285             | 33206            | 84.73    | 11.00     | 4.16       | 0.11              | –       |
| Colitis 7        | 6952              | 7085             | 99.15    | 0.20      | 0.07       | 0.58              | –       |
| Colitis 8        | 12508             | 11910            | 87.36    | 8.25      | 3.38       | 1.02              | –       |
| Colitis 9        | 7613              | 7493             | 96.68    | 2.87      | 0.32       | 0.13              | –       |
| Colitis 10       | 8275              | 7929             | 86.91    | 5.99      | 6.96       | 0.14              | –       |
| Mean ( $\pm$ SD) | 10,117<br>(7,445) | 9,692<br>(8,659) | 86.42    | 8.73      | 4.47       | 0.38              | 0.00    |
| Total            | 162,786           | 156,419          |          |           |            |                   |         |

Total number of reads after data cleaning (pyrosequencing noise and chimera removal), after filtering (e-value of 30, minimum identity of 97% and minimum alignment of 75bp on MG-RAST), and percentage of reads classified by MG-RAST using the SSU databank as Bacteria, Eukaryota, Archaea, unclassified bacteria and sequences unassigned to any Kingdom. Means and standard deviations ( $\pm$ SD) among healthy horses and horses with colitis are also presented.  
doi:10.1371/journal.pone.0041484.t002

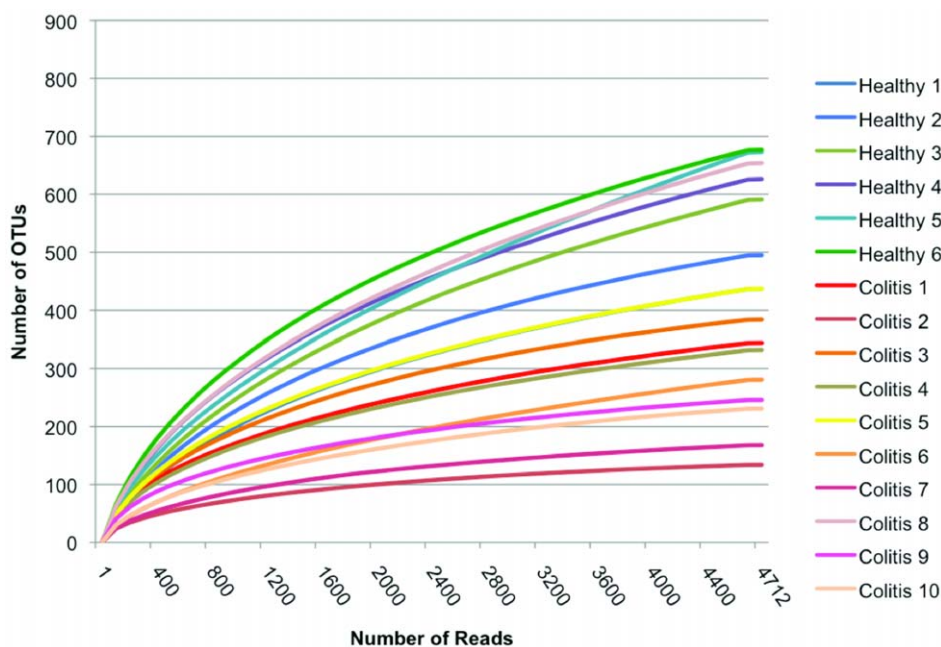

**Figure 1. Rarefaction curves.** Rarefaction curves comparing the number of reads with the number of phylotypes found in the DNA from feces of healthy horses (Healthy 1–6) and horses affected by colitis (Colitis 1–10).  
doi:10.1371/journal.pone.0041484.g001

**Table 3.** Classification and species richness of the fecal bacteria of healthy horses and horses affected by colitis.

| Horse      | Firmicutes | Bacteroidetes | Proteobacteria | Actinobacteria | Spirochaetes | Unclassified | Fusobacteria | Total   | Species richness |
|------------|------------|---------------|----------------|----------------|--------------|--------------|--------------|---------|------------------|
| Healthy 1  | 39.5       | 12.2          | 42.7           | 4.2            | –            | –            | –            | 6,602   | 189              |
| Healthy 2  | 48.7       | 9.0           | 36.5           | 4.0            | 1.0          | –            | –            | 4,865   | 160              |
| Healthy 3  | 78.0       | 8.9           | 3.4            | 7.6            | –            | –            | –            | 17,170  | 230              |
| Healthy 4  | 73.4       | 21.3          | –              | 1.9            | 2.1          | –            | –            | 10,097  | 178              |
| Healthy 5  | 73.1       | 13.8          | –              | 3.5            | 8.7          | –            | –            | 3,438   | 142              |
| Healthy 6  | 72.6       | 20.1          | –              | 2.6            | 1.7          | 1.2          | –            | 9,834   | 225              |
| Mean       | 68.1       | 14.2          | 10.1           | 4.5            | 1.9          | 0.2          | 0.0          | 52,006  |                  |
| Colitis 1  | 49.2       | 46.0          | 3.1            | –              | –            | –            | –            | 4,782   | 138              |
| Colitis 2  | 65.4       | 25.8          | 7.1            | –              | –            | –            | –            | 2,939   | 70               |
| Colitis 3  | 51.9       | 38.5          | 3.0            | –              | –            | –            | 5.1          | 5,089   | 154              |
| Colitis 4  | 37.5       | 44.2          | 6.1            | –              | –            | –            | 10.6         | 3,579   | 170              |
| Colitis 5  | 33.1       | 50.7          | 7.5            | –              | 2.3          | –            | 5.5          | 7,677   | 240              |
| Colitis 6  | 11.9       | 38.3          | 48.5           | –              | –            | –            | –            | 28,136  | 166              |
| Colitis 7  | 33.5       | 27.3          | 2.4            | –              | –            | –            | 35.6         | 7,025   | 120              |
| Colitis 8  | 38.8       | 48.0          | 5.0            | –              | –            | –            | 5.8          | 10,424  | 241              |
| Colitis 9  | 28.3       | 69.5          | –              | –              | –            | –            | –            | 7,253   | 115              |
| Colitis 10 | 39.6       | 5.7           | 52.5           | 1.8            | –            | –            | –            | 6,893   | 147              |
| Mean       | 30.3       | 40.0          | 18.74          | 0.4            | 0.3          | 0.0          | 5.2          | 83,797  |                  |
| Total      |            |               |                |                |              |              |              | 135,803 |                  |

Classification of the intestinal bacteria of healthy horses and horses affected by colitis (in percentages) at the phylum level, total number of bacterial reads and species richness after data cleaning (pyrosequencing noise and chimera removal) and filtering (e-value of 30, minimum identity of 97% and minimum alignment of 75bp on MG-RAST).

doi:10.1371/journal.pone.0041484.t003

Species richness is presented in Table 3. Species diversity assessed by the inverse Simpson index and confidence intervals for the OTUs and phylotypes are presented in Tables 4 and 5, respectively. Comparison between the groups was not statistically different for either the OTU ( $P=0.658$ ) or the phylotype ( $P=0.194$ ) approaches.

### Population Analysis – OTU Approach

The total number of sequences, coverage, number of OTUs and inverse Simpson index with confidence intervals for each fecal sample are presented in Table 4.

The Phylogenetic trees generated using the Yue & Clayton measure and Jaccard index are presented in Figures 3a and 3b,

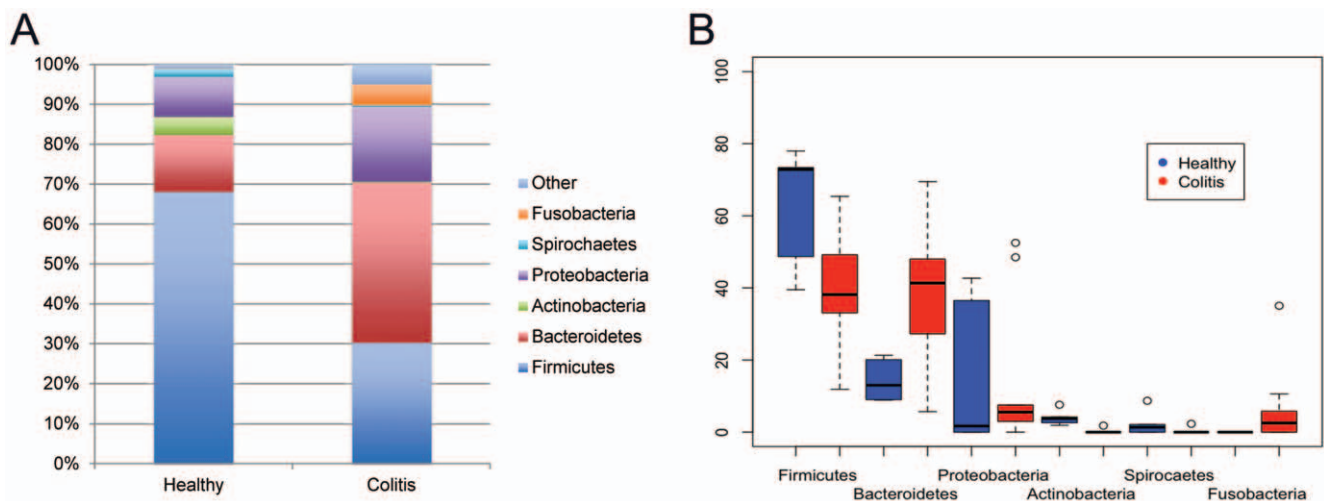

**Figure 2. Fecal bacterial population.** Overall percentages of bacterial populations at the phylum level (Fig. A) and intra-phylum variation (Fig. B) present in feces of healthy horses and horses affected by colitis.

doi:10.1371/journal.pone.0041484.g002

**Table 4.** Total number of sequences, coverage, number of OTUs and inverted Simpson with lower and upper confidence interval limits.

| Horse      | Sequences | Coverage | OTUs | Simpson | Lower ci | Upper ci |
|------------|-----------|----------|------|---------|----------|----------|
| Healthy 1  | 4712      | 0.963    | 437  | 6.004   | 5.640    | 6.418    |
| Healthy 2  | 4712      | 0.961    | 495  | 7.931   | 7.454    | 8.472    |
| Healthy 3  | 4712      | 0.940    | 591  | 13.028  | 12.102   | 14.107   |
| Healthy 4  | 4712      | 0.941    | 626  | 27.727  | 25.513   | 30.362   |
| Healthy 5  | 4712      | 0.918    | 673  | 37.933  | 35.565   | 40.638   |
| Healthy 6  | 4712      | 0.940    | 677  | 61.778  | 57.317   | 66.991   |
| Colitis 1  | 4712      | 0.973    | 344  | 35.421  | 33.581   | 37.474   |
| Colitis 2  | 4712      | 0.992    | 134  | 6.366   | 6.043    | 6.725    |
| Colitis 3  | 4712      | 0.974    | 384  | 28.828  | 27.081   | 30.815   |
| Colitis 4  | 4712      | 0.973    | 332  | 18.867  | 17.755   | 20.128   |
| Colitis 5  | 4712      | 0.964    | 437  | 24.496  | 23.014   | 26.181   |
| Colitis 6  | 4712      | 0.970    | 281  | 5.007   | 4.751    | 5.292    |
| Colitis 7  | 4712      | 0.989    | 168  | 6.440   | 6.162    | 6.743    |
| Colitis 8  | 4712      | 0.935    | 654  | 62.028  | 58.148   | 66.462   |
| Colitis 9  | 4712      | 0.984    | 246  | 14.669  | 13.717   | 15.762   |
| Colitis 10 | 4712      | 0.983    | 231  | 7.365   | 6.973    | 7.802    |

doi:10.1371/journal.pone.0041484.t004

respectively. Results of the Parsimony test obtained after phylogenetic analysis were significantly different for both the Yue & Clayton measure ( $P=0.035$ ) and for the Jaccard index ( $P<0.001$ ), ignoring the branch length, indicating that the structures of the bacterial communities from both groups were different. When the branch length was considered, significantly different structures were still present between the two groups using the weighted UniFrac for the Yue & Clayton measure ( $P<0.001$ ) and the Jaccard index ( $P<0.001$ ) and also using the unweighted UniFrac for the Yue & Clayton measure ( $P=0.014$ ) and Jaccard index ( $P=0.002$ ), demonstrating that the groups were significantly different, regardless of the test used for comparison.

Figure 4a and 4b are the graphic representation of the PCoA analysis of each sample for the Yue & Clayton measure and Jaccard index, respectively. Figures 4c and 4d represent the NMDS analysis for the Yue & Clayton measure and Jaccard index, respectively. The spatial separation between centers of the clouds from the two groups in the NMDS plot was statistically different when compared by the AMOVA test ( $P<0.001$ ). We found 1159 OTUs significantly different between the two groups using the Metastats.

In an attempt to identify a core microbiome present in healthy horses, the OTUs shared among Healthy 3, 4, 5 and 6 was investigated. Since Healthy 1 and 2 were residing in a Teaching Hospital and had different fecal microbiomes when compared to samples originated from regular stables, these two horses were not included in this analysis. Overall, 1620 different OTUs (richness) were found in Healthy 3, 4, 5 and 6, of which, only 123 OTUs were shared between them and only 6 were present at least 25 times per horse. The most abundant OTU shared between those animals was classified as *Roseburia* sp, a member of the Lachnospiraceae family. From the remaining shared OTUs, four were unclassified bacteria from the Lachnospiraceae family and one was unclassified bacterium at the phylum level.

**Table 5.** Total number of sequences, coverage, number of Phylotypes and inverted Simpson with lower and upper confidence interval limits.

| Horse      | Sequences | Coverage | Phylo* | Simpson | Lower ci | Upper ci |
|------------|-----------|----------|--------|---------|----------|----------|
| Healthy 1  | 4712      | 0.998    | 57     | 5.241   | 5.003    | 5.503    |
| Healthy 2  | 4712      | 0.999    | 49     | 6.382   | 6.137    | 6.648    |
| Healthy 3  | 4712      | 0.998    | 59     | 6.799   | 6.515    | 7.109    |
| Healthy 4  | 4712      | 0.998    | 49     | 6.274   | 6.043    | 6.524    |
| Healthy 5  | 4712      | 0.998    | 50     | 6.186   | 5.918    | 6.480    |
| Healthy 6  | 4712      | 0.996    | 66     | 5.193   | 4.957    | 5.453    |
| Colitis 1  | 4712      | 0.999    | 57     | 11.241  | 10.776   | 11.747   |
| Colitis 2  | 4712      | 0.999    | 47     | 5.333   | 5.112    | 5.573    |
| Colitis 3  | 4712      | 0.997    | 55     | 6.907   | 6.656    | 7.177    |
| Colitis 4  | 4712      | 0.998    | 53     | 6.149   | 5.913    | 6.405    |
| Colitis 5  | 4712      | 0.997    | 77     | 11.844  | 11.420   | 12.299   |
| Colitis 6  | 4712      | 0.998    | 49     | 4.104   | 3.952    | 4.269    |
| Colitis 7  | 4712      | 0.998    | 43     | 4.649   | 4.500    | 4.808    |
| Colitis 8  | 4712      | 0.999    | 64     | 9.840   | 9.415    | 10.305   |
| Colitis 9  | 4712      | 0.999    | 42     | 5.444   | 5.193    | 5.720    |
| Colitis 10 | 4712      | 0.999    | 55     | 7.340   | 6.984    | 7.733    |

\*Phylotypes.

doi:10.1371/journal.pone.0041484.t005

### Population Analysis – Phylotype Approach

The total number of sequences, coverage, number of OTUs and inverse Simpson index with confidence intervals for each fecal sample are presented on Table 5.

The Phylogenetic trees generated by the MOTHUR using the Yue & Clayton measure and Jaccard index are presented in Figures 5a and 5b, respectively. When the Parsimony test was applied to compare the structure of the bacterial communities from healthy horses and horses with colitis obtained with the phylogenetic analysis, statistically significant differences were identified for both the Yue & Clayton measure ( $P=0.004$ ) and the Jaccard index ( $P<0.001$ ) ignoring the branch length. When the branch length was considered, significantly different structures were identified between the two groups using the weighted UniFrac for the Yue & Clayton measure ( $P<0.001$ ) and the Jaccard index ( $P<0.001$ ), and also using the unweighted UniFrac for the Yue & Clayton measure ( $P=0.006$ ) and Jaccard index ( $P<0.001$ ).

The spatial separation between the centers of the clouds from the two groups in the NMDS was statistically different when compared by the AMOVA test for the Yue & Clayton measure ( $P=0.002$ ) and the Jaccard index ( $P<0.001$ ). One hundred three of 180 OTUs were significantly different between the two groups using the Metastats program.

### Selected Species-level Identifications

While the study was not designed to determine the etiology of diarrhea, some notable species-level identification was investigated. Sequences with more than 98% identify with *C. difficile* were present in feces of Colitis 1, 3, 5, 9 and 10 and Healthy 5. Sequences consistent with *Clostridium perfringens* were detected in the feces of Colitis 4 and 8. *Clostridium sordellii* was present in feces from Colitis 10 only.

No *Escherichia coli* sequences were present in feces of any of the healthy horses; however, the organism was found in eight of the

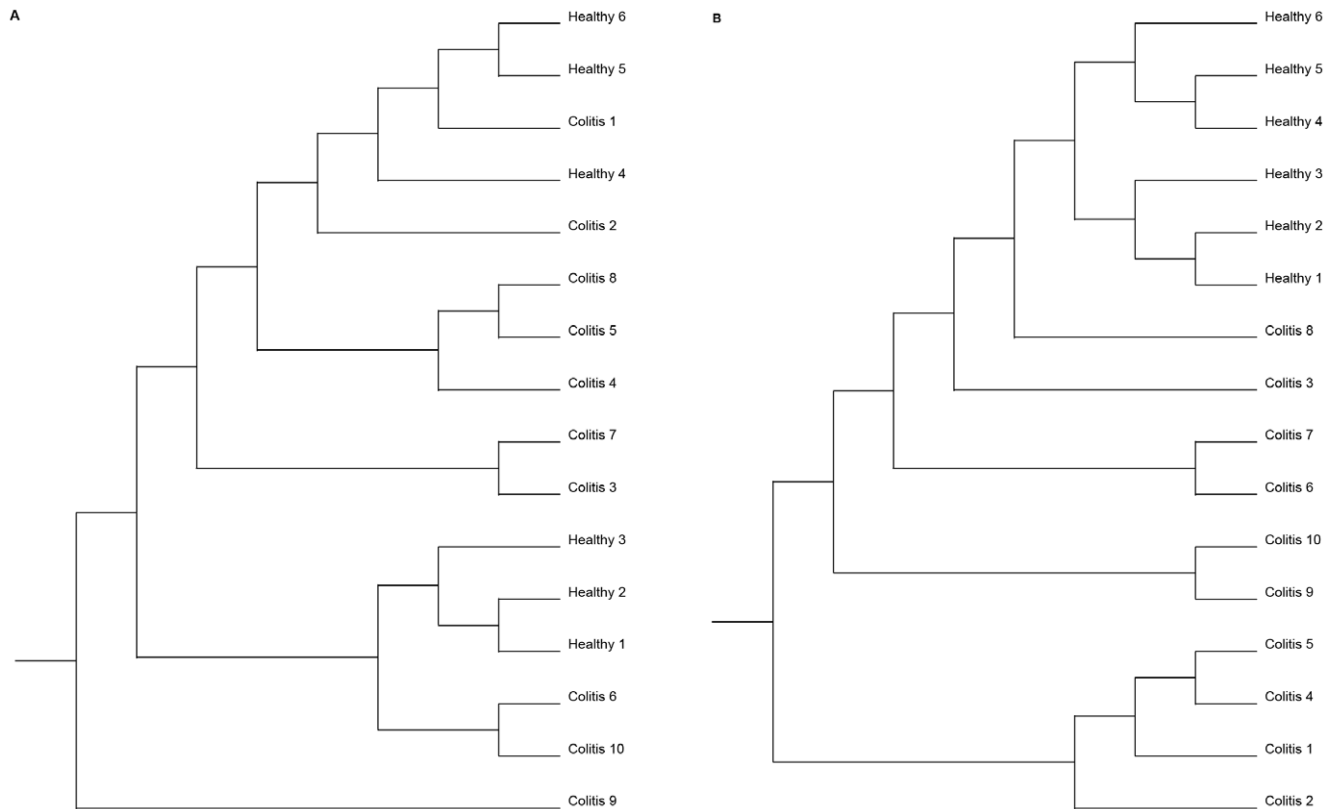

**Figure 3. Phylogenetic trees – OTUs approach.** Phylogenetic tree demonstrating the similarity of OTUs found in feces of healthy horses (Healthy 1–6) and horses affected by colitis (Colitis 1–10). Results were obtained using the Yue & Clayton measure (A) and the Jaccard index (B). doi:10.1371/journal.pone.0041484.g003

ten horses with colitis (Colitis 2, 3, 4, 5, 7, 8 and 9). *Salmonella* spp. were not identified.

Sequences consistent with *Shigella boydii*, *S. flexneri* or *S. dysenteriae* were present in Colitis 6, 7 and 9. In contrast, no sequences consistent with *Shigella* spp. were present in feces of healthy horses using the proposed cut-off values.

## Discussion

Our results characterize the fecal microbiome of six healthy horses by high throughput sequencing technology. Firmicutes was found to be the major bacterium phylum populating the distal intestine of healthy horses, which is consistent with a recent smaller metagenomic study of feces [16]. The predominance of Firmicutes may be related to the anatomical physiology and feeding habits of this species, which ingests mainly insoluble fiber and uses the cecum and large colon as the main sites for fermentation. In fact, significant bacterial changes have been reported in dogs after supplementation with dietary fiber, which led to an increase in Firmicutes and decreased Fusobacteria [17]. In contrast, Willing et al. [18] compared the bacterial component of feces from horses submitted to two different diets and observed that horses receiving supplementation with concentrate had 10 times more lactic acid producing bacteria than horses receiving a forage-only diet. In addition, almost 50% of sequences from feces of horses receiving a forage-only diet were classified as Bacteroidetes and 46% were Firmicutes, while 27% of the sequences from horses receiving concentrate were Bacteroidetes and 73% were Firmicutes. However, that study only involved evaluation of 67 sequences, greatly limiting the conclusions that can be made.

The microbiomes of Healthy 1 and 2 were closely related, and both contained a high proportion of Proteobacteria. Increases in Proteobacteria have been reported in humans with IBD [19] and recurrent *C. difficile* infection [20]; however, these horses were clinically normal. Interestingly, Healthy 1 and 2 were the only animals housed in the same barn (side by side stalls) with identical diet and management, and these data suggest that dietary and management factors may have a significant impact on the intestinal microbiome in healthy horses. Additionally, those two horses were teaching horses that resided in a veterinary teaching hospital, albeit in a separate ward from clinical patients. The high abundance of Proteobacteria in these two horses was largely due a high number of Gammaproteobacteria, particularly *Acinetobacter* spp. Since *Acinetobacter* spp. can be hospital-associated pathogens (albeit rarely diagnosed in this institution), it is possible that the place of residence of these horses also had an impact on the microbiome composition. These results are also consistent with a recent study that demonstrated similar bacterial communities in the rumen of dairy cows housed together [21]. However, Durso et al. [22] suggested that the environment may not be the most important source for intestinal bacteria, as the bacteria present in the surface of feedlot pens were very different from ones present in feces of beef cattle. These studies therefore raise questions about the role of the environment in establishment and maintenance of the gut microbiome. General management factors must be considered when designing and interpreting microbiome studies, but it is clear that further study of factors that influence an individual horse's gut microbiome is required.

Alteration of the intestinal microbiome in colitis was not unexpected. However, these results indicate a rather profound

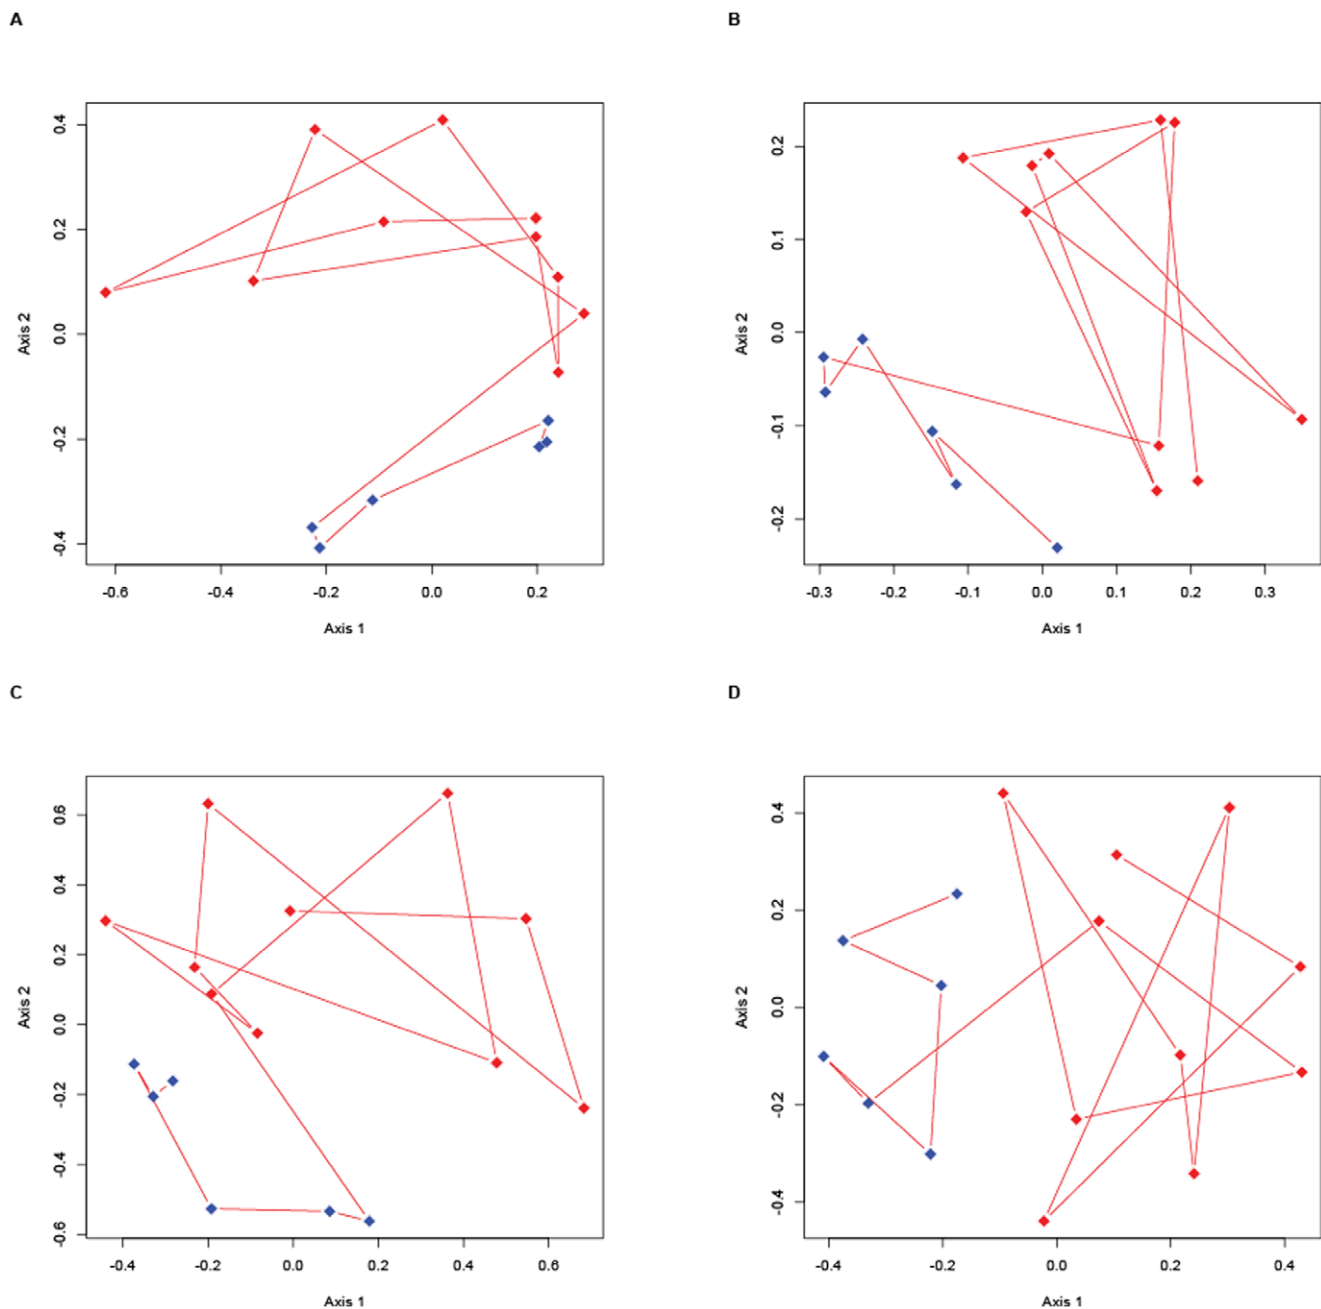

**Figure 4. PCoA and NMDS.** PCoA (Fig. A and B) and NMDS (Fig. C and D) showing the representation of vectorial analysis of sequences found in feces of healthy horses (blue dots) and horses affected by colitis (red dots). Results were obtained using the Yue & Clayton measure (Fig. A and C), the Jaccard index (Fig. B and D).  
doi:10.1371/journal.pone.0041484.g004

alteration, given the numerous phylum-level differences in relative abundance. Significant changes at the phylum level have also been shown in people with chronic inflammatory conditions [23,24], obesity [25] and in dogs with diarrhea [26]. Differentiating cause and effect is not possible without a greater understanding of pathophysiology, but identification of organisms disproportionately present in horses with colitis could lead to investigation of their potential role as causative agents.

Bacteroidetes was the dominant phylum among horses affected by colitis. This phylum has been reported to be the most abundant in healthy people [8] and a decrease in its relative abundance has

been associated with obesity [25] and chronic diarrhea in humans [24]. In healthy horses, it only accounts for a minority of sequences, presumably because of the lesser role in hindgut fermentation compared to the dominant Firmicutes phylum, and the reason for the apparent proliferation of members of this phylum in horses with colitis is unclear.

Fusobacteria were rare in healthy horses but significantly more abundant in horses with colitis. While cause versus effect cannot be discerned, this raises some interesting questions given increasing information about the role of *Fusobacterium* spp in various gastrointestinal diseases of humans, including Crohn's disease

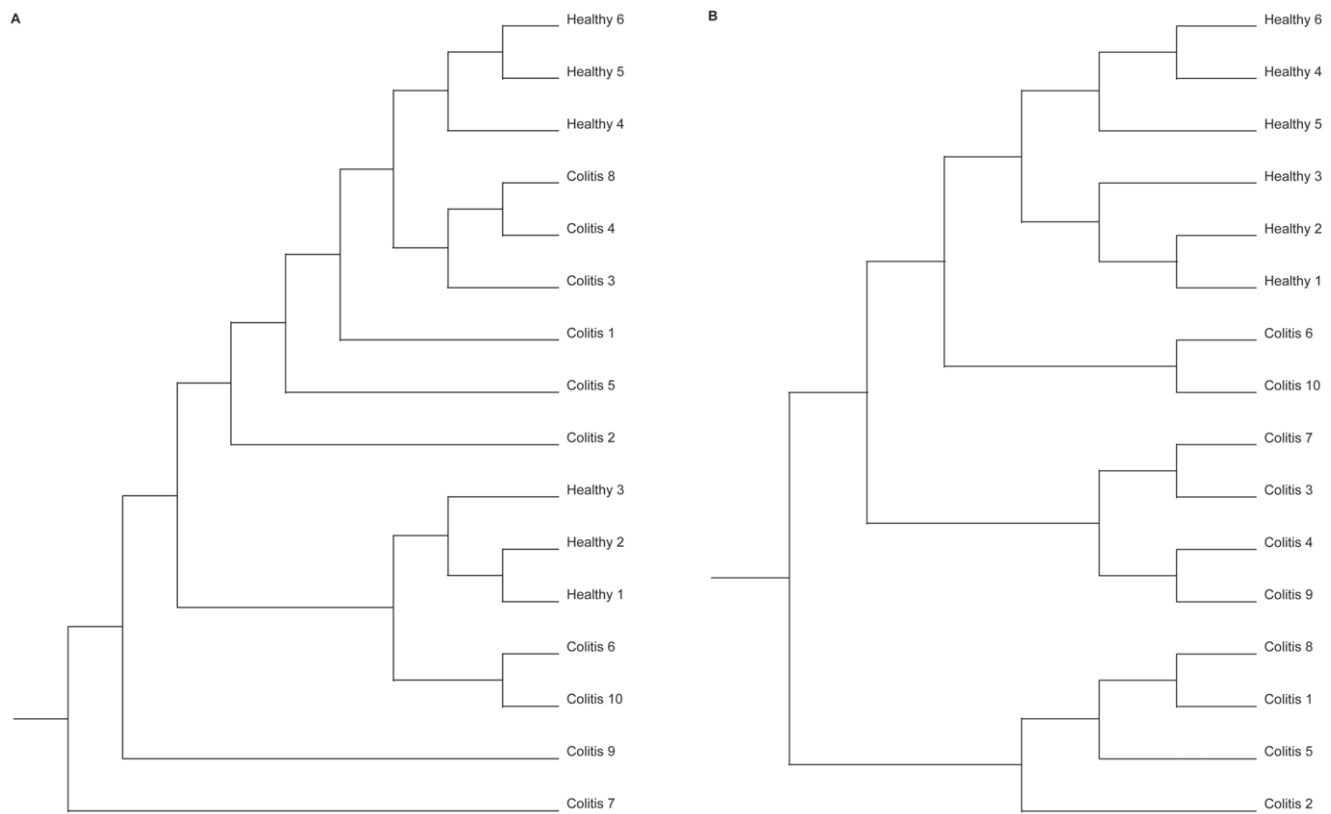

**Figure 5. Phylogenetic trees – Phylotypes approach.** Phylogenetic tree demonstrating the similarity of Phylotypes found in feces of healthy horses (Healthy 1–6) and horses affected by colitis (Colitis 1–10). Results were obtained using the Yue & Clayton measure (A) and the Jaccard index (B).

doi:10.1371/journal.pone.0041484.g005

[27], colorectal cancer [28,29] and appendicitis [30]. Ulcerative colitis caused by *F. varium* has been experimentally induced in mice [31]. Whether the higher percentages of *Fusobacterium* spp. found in the colitis group was a consequence of overgrowth due to bacterial dysbiosis, or whether this genus has a major role in the etiology of disease, remains uncertain, but requires investigation. While *Fusobacterium* spp. have been isolated from horses with pleuropneumonia [32], there do not appear to be any studies that have investigated Fusobacteria as equine enteropathogens.

Traditionally, *C. difficile*, enterotoxigenic *C. perfringens* and *Salmonella* spp. have been incriminated as the most important etiological agents causing diarrhea in horses [5,6]. However, most cases of equine colitis remain without a clear etiologic diagnosis [5]. Indeed up to 45% of foals referred to a hospital because of diarrhea had no infectious agents detected [33] and only 25% of horses with diarrhea had clostridial toxins in their detected feces [34]. Whilst metagenomic study is best suited for high level assessment of overall microbiome composition, scanning of individual bacterial genera or species can provide some insight into potential causes of disease. Care must be taken when assigning identities at the species level because of the variable discriminatory power of 16S rRNA gene identification for some species. Regardless, the presence of novel potential pathogens in horses with colitis, but not in healthy horses (e.g. *Shigella* spp.) deserves attention, since detection of these organisms is not part of the routine diagnostic workup in horses affected by colitis. This study certainly does not implicate these species as etiologic agents but suggests that study of a potential role in disease is indicated. Culture and sequencing or organism-specific quantitative real time

PCR could have been performed in order to confirm the presence of those pathogens, but discovery of novel pathogens was not the focus of this study. Microbiome studies such as this cannot incriminate novel pathogens but provide preliminary information about organisms that should be further studied as causative agents.

*Clostridium difficile* was detected in feces of five of ten horses with colitis, while none had detectable *C. difficile* toxins in fecal samples. This bacterium can be found in healthy horses [35], so this could simply reflect colonization, however it is also known that fecal ELISA assays are only moderately sensitive, so the relevance of this result is unclear.

Our results are in agreement with the findings of Shepherd et al. [16] who reported Firmicutes to represent 43.7% of sequences obtained from feces of healthy horses. Daly et al. [7] also reported this phylum to be the most prevalent as assessed by cloning of the 16S rRNA gene. The higher abundance of Firmicutes and the genus *Clostridium* among healthy horses reported here is important, as clostridia have been traditionally associated with pathogenicity, despite the fact that only a few of the *Clostridium* spp. found here are known enteropathogens. Assessment of clostridia is further compounded by the archaic taxonomy, with *Clostridium* species spanning several families, including Clostridiaceae, Ruminococcaceae, Eubacteriaceae and Lachnospiraceae, with the potential that relevant differences are masked by weaknesses in current taxonomical assignments. The vast clostridial abundance and diversity in healthy horses should also be considered in light of the common recommendation of metronidazole as a treatment for known or suspected clostridial colitis, as well as idiopathic colitis. Since clostridia may be a key core component of the equine



intestinal microbiome, such a non-specific approach to treatment could be detrimental in some situations through further disruption of the already altered intestinal microbiome. The impact of metronidazole on the intestinal bacteria of horses deserves further investigation.

The core microbiome of the equine species has not been objectively investigated. The studies cited above have either used culture-based methods or did not have enough depth for an adequate characterization of microorganisms at lower phylogenetic levels. Our finding that Clostridiales, members of the Lachnospiraceae family, were the most abundant bacteria shared between healthy horses may suggest that this group of organisms is part of the core bacterial population of healthy individuals and deserves further investigation.

The use of probiotics has been suggested as a prophylactic and therapeutic adjuvant in cases of chronic diarrhea in humans [36]. To date, the development of probiotics for the equine species has not been successful [37-39]. There are many potential reasons for this, but it may relate in part to our previously poor understanding of the equine intestinal microbiome. Specifically, probiotic approaches in horses have focused on lactic acid bacteria, which comprise only a small component ( $\leq 7.1\%$ ) of the microbiome of healthy horses and which were not decreased in disease. It is possible that probiotic therapy should target other, more common, components of the microbiome, particularly clostridia and other abundant members of the Firmicutes phylum.

Bacterial species richness and diversity are thought to be important components of a 'healthy' intestinal microbiome. Decreases in richness and diversity have been associated with conditions such as chronic diarrhea and recurrent *C. difficile* infection (CDI) in humans [24,40]. Restoration of bacterial diversity and richness is the principle behind fecal microbiota transplantation, an approach that has received much attention recently for successful treatment of recurrent CDI [41,42]. Surprisingly, equine colitis was not associated with loss of diversity and richness, but further studies using more uniform groups of horses with specific etiologies are required. Microbiota transplantation might potentially be an effective treatment to restore this complex environment towards is considered more 'normal'.

The majority of reads obtained in this study were correctly classified as bacteria, however, one horse (Colitis 5) had 17.6% of unassigned reads and another (Healthy 5) had 8.6% as unclassified sequences derived from bacteria. Some metagenomic studies have reported higher proportions of unclassified bacteria [7,16], however those have typically involved studies that did not report rigorous quality control and chimera screening efforts. Most recent studies have reported lower counts of unclassified bacteria, similar to what was obtained with the other 14 horses in this study. The reason for these two outliers is uncertain, as it would be surprising that after all filtering and cleaning procedures, so many chimeras would remain present in those files. A high abundance of truly unclassified bacteria is unlikely, but not impossible. In fact, when unknown sequences from Healthy 5 were compared to the NCBI BLAST nucleotide collection (nr/nt), it was consistent with *Streptococcus infantarius* (Total score: 3253, E value: 6e-151 and maximum identity: 100%, accession: CP003295) and with an uncultured bacterium previously found in horses (Total score: 520, E value: 3e-144 and maximum identity: 100% accession: EU775872). When unknown sequences from Colitis 5 were compared to this databank, several hits were not bacterium specific and other sequences were consistent with *Pseudomonas* spp., *Serratia* spp. and several uncultured bacteria.

The more uneven distribution of bacteria found among horses with colitis on the PCoA and NMDS may reflect the different

etiologies affecting each horse. Therefore, further studies using more uniform groups with an established diagnosis (e.g.: *Clostridium difficile* infection, salmonellosis, etc) may reveal better patterns of changes in the intestinal flora that may aid in the development of prophylactic and therapeutic procedures.

Despite slightly different phylogenetic trees, PCoA and NMDS plots generated by the different statistical tests, all the results were very consistent and clustered the six healthy horses together. Those differences could be due to the differences between the Jaccard and the Yue & Clayton measures of dissimilarity, which use geometric and arithmetic means, respectively attributing different weights for the relative abundance.

While culture-independent methods and next generation sequencing eliminate many of the biases inherent in culture or cloning-based techniques, there can be some PCR amplification bias, so certain groups (e.g. *Bifidobacterium* spp.) may be underestimated [43]. Therefore, evaluation of other target genes is indicated for further comprehensive study of this microbiome. Our results confirm the need for non-culture-dependent methods, since various organisms refractive to culture (e.g. *Clostridium sordeilli*) and previously unidentified organisms were found here. In addition, low-abundance species may be missed with metagenomic studies compared to targeted enrichment culture based approaches. Rarefaction curves for this study indicated good sampling completeness, with few new OTUs expected to be identified with assessment of further sequences, however there will always be some under-estimation of overall diversity and species number, with sporadic detection of uncommon species.

The number of horses used in this study was small and as only one sample per animals was analyzed some of the differences between groups may be due to interhorse variation. However, the similarities among microbiomes of healthy horses housed at the same management, and among horses with colitis is indicative that interhorse variation may not be great, at least at the phylum level. Therefore, our study is the basis for further studies using a larger number of animals addressing the impact of environment and different management systems and diets on the gut microbiome.

Finally, considering the large anatomical size of the equine gastrointestinal tract and the differences in intestinal environments throughout the intestinal tract, it remains uncertain if fecal bacteria directly reflect the bacterial population present in the large colon. However, differences between the groups at higher phylogenetic levels (phyla) found here were suggestive that, as in other animals, evaluation of the fecal microbiome is an appropriate way to gain a high-level view of intestinal microbiome diversity. However, further studies comparing the bacterial population from different compartments of the equine intestinal tract are ultimately required.

## Conclusions

The marked differences in the microbiome between healthy horses and horses with colitis indicate that colitis may be a disease of gut microbiome dysbiosis, rather than one that occurs simply through overgrowth of an individual pathogen. The predominance of clostridia and related organisms demonstrates the importance of this group of bacteria in healthy horses. The abundance of Fusobacteria in horses with colitis deserves special attention and further investigation, as the role of this phylum in equine colitis is currently unknown. The species richness reported here indicates the complexity of the equine intestinal microbiome and this study provides the most comprehensive indication of this important and complex microbiome to date.

## Materials and Methods

### Animal Selection

The study was approved by the University of Guelph Animal Care Committee.

Six healthy horses (Healthy 1 to 6) were enrolled in this study. Healthy 1 and 2 were mature Thoroughbred teaching mares that resided at the Ontario Veterinary College, were housed beside each other and had a diet exclusively of grass-hay. Healthy 3 was a 4-year-old female mixed-breed pony fed grass-hay only with free access to pasture. Healthy 4 was a 23-year-old retired Quarter Horse gelding fed grass-hay and a commercial complete pelleted feed (14% crude protein: 3.5 kg per day). Healthy 5 was a 7-year-old mixed-breed mare used for pleasure riding fed grass-hay and a 5kg/day of a commercial hi-fat/hi-fiber feed (5 kg per day). Horse 6 was a 6-year-old Quarter Horse mare used for pleasure riding fed grass-hay and 6 kg/d of a commercial complete pellet feed (12% crude protein). The last four horses were housed on four different farms in Ontario. Samples were collected during November of 2010. None of the horses had received antimicrobials or anti-inflammatory drugs, or had gastrointestinal related disease in the six previous months. One fecal sample from each horse was collected off the ground immediately after defecation. Approximately 10g of feces were collected from fecal balls, avoiding collection of fecal material that was touching the ground. Fecal samples were kept frozen at  $-80^{\circ}\text{C}$  until DNA extraction.

Fecal samples from 10 horses (Colitis 1 to 10) that presented to the Ontario Veterinary College for evaluation of acute colitis (1-3 days duration) were collected within the first 24h of hospitalization. Inclusion criteria were to have five negative cultures for *Salmonella* spp, as well as single negative fecal ELISA results for *Clostridium perfringens* enterotoxin and *C. difficile* toxins A and B, as those are the most prevalent infectious agents isolated from cases of colitis in this area. Samples were collected between November 2009 and April 2011 and kept frozen at  $-80^{\circ}\text{C}$  until DNA extraction. Three of the horses were Thoroughbred, three were Warmblood, two were ponies and two were mixed-breed. Mean age was 6.35 years (range: 0.5 to 18 years).

### DNA Extraction, 16S rRNA Gene PCR and Sequencing

DNA was extracted from fecal samples with the use of a glass bead based extraction kit (E.Z.N.A. Stool DNA Kit, Omega Bio-Tek Inc., USA) using the manufacturer's "stool DNA protocol for pathogen detection" protocol. DNA quantification and quality were accessed by spectrophotometry using the NanoDrop® (Roche, USA).

DNA concentrations were diluted to a final concentration of 20 ng/ $\mu\text{L}$  for PCR amplification of the V3-V5 region of the 16S rRNA gene using the primers 357f (CCTACGGGAGGCAG-CAG) and 926r (CCGTCAATTCMTTTRAGT), as described by Wu et al. [9]. Forward primers were designed with the adaptor A sequence (CGTATCGCCTCCCTCGCGCCA) plus a key sequence (TCAG) and reverse primers with the adaptor B sequence (CTATGCGCCTTGCCAGCCCG) plus a key sequence (TCGA) as recommended by the 454 Sequencing Technical Bulletin No. 013-200. In addition, each sample had a different ten base pair sequence in the forward primer used as a Multiplex Identifier (MID). For a final volume of 50 $\mu\text{L}$ , 2  $\mu\text{L}$  of each DNA sample was added to a solution containing 16  $\mu\text{L}$  of water, 25  $\mu\text{L}$  of ReadMis (Invitrogen, USA), 2  $\mu\text{L}$  of BSA (Invitrogen, USA), 2  $\mu\text{L}$  of each primer (1000 pmol/ $\mu\text{L}$ ) and 1  $\mu\text{L}$  of  $\text{MgCl}_2$  (50Mmol). The mixture was subjected to the following PCR conditions: 5 min at  $95^{\circ}\text{C}$  for denaturing, and 28 cycles of 15 sec at  $95^{\circ}\text{C}$  for denaturing, 45 sec at  $56^{\circ}\text{C}$  for annealing and 60 sec at  $72^{\circ}\text{C}$  for

elongation followed by a final period of 8 min at  $72^{\circ}\text{C}$  and kept at  $4^{\circ}\text{C}$  until processed (within 2 hours). A negative control, as well as a positive control (DNA of *Clostridium difficile*), was used.

PCR products were evaluated by electrophoresis in 2% agarose gel and purified using the QIAquick PCR purification kit (Qiagen, Valencia, CA). Amplicons were then purified using the Agencourt AMPure XP (Beckman Coulter Inc, Mississauga, ON), and quantified by the Quant-iT™ PicoGreen® dsDNA Assay kit (Invitrogen, Burlington, ON) following the "Amplicon Library Preparation Method Manual" of the 454 GS Junior Titanium System (454 Life Sciences, Roche, USA). Emulsion PCR was performed according to the "em-PCR Amplification Method Manual -Lib L" and sequencing was performed using a 454 GS Junior Titanium System following the "Sequencing Method Manual".

Data was made publicly available at the NCBI Sequence Read Archive under the accession number [SRA052596.1](https://www.ncbi.nlm.nih.gov/SRA/052596.1) and at the MG-RAST project 435 (MGP435).

### Sequence Analysis and Statistical Analysis

The MOTHUR package of algorithms [10] was used for pyrosequencing noise removal from the original flow files [11] and for chimera removal [12]. Sequences that were less than 200 bp in length or that contained homopolymers longer than 8 bp were removed, allowing for 1 mismatch to the barcode and 2 mismatches to the primer. Output files were uploaded to the MG-RAST server [13] using the SILVA Small Subunit rRNA Database (SSU) as reference. An e-value of  $10\text{E}-30$ , a minimum alignment length of 75bp and a minimum percentage identity of 97% were used as cut-off values for quality control in addition to the initial trimming and filters. The total number of sequences classified as Bacteria were then used for relative abundance calculation. A 100% stacked column chart comparing the relative abundances of each phylum in the two groups was generated using Microsoft Excel. Intra-phylum variance was represented by a boxplot created using R! software. Finally, MOTHUR was used to align sequences with the SILVA 16S rRNA reference database, with taxonomic classifications obtained from the Ribosomal Database Project (RDP) and assigned into OTUs using a cutoff of 0.15 for the distance matrix and into phylotypes by clustering all OTUs belonging to the same genus.

To provide further assessment of species-level identification of selected organisms, sequences were loaded into the NCBI Basic Local Alignment Search Tool (BLAST) website using the nucleotide collection (nr/nt) database [14].

The MOTHUR software was used for diversity and richness estimation by generating collector curves of the Chao1 richness estimators, the inverse Simpson diversity index and rarefaction curves at 0.03 distances, which were plotted on a line chart using Microsoft Excel. Two sample T-test with 95% confidence intervals was used to compare the Simpson indexes between groups. The significance of the dissimilarity between the two groups was measured by the Yue & Clayton measure of dissimilarity taking into account the relative abundance of OTUs present in each group and by the traditional Jaccard index taking into account the number of shared OTUs between the groups. The same tests were repeated using the sequences classified into Phylotypes at the genus level.

Dendrograms were created using MOTHUR to compare the similarity of the intestinal bacteria among all samples used in the study using both, the Jaccard index and the Yue & Clayton measure, which account for the relative abundances in each sample. Figures were generated by TreeView 1.6.6. The parsimony, unfract-weighted and unfract-weighted tests were applied to determine

significance of clustering between the groups in both, OTUs and Phylotypes based dendrograms.

Clustering of individuals was also evaluated by plotting the resultant vector of the Principal Coordinate Analysis (PCoA) and by the non-metric multidimensional scaling (NMDS) with 2 dimensions. The R! software was used to generate figures. Analysis of molecular variance (AMOVA) was used to test if the distance between the centers of the clouds of the two groups was greater than individual variation among samples. The correlation of the relative abundance of each OTU with the two axes in the NMDS dataset was calculated in order to determine which OTUs or Phylotypes were responsible for shifting the samples along the two axes. Finally, the

Metastats program [15] through MOTHUR was used to identify statistically different OTUs or Phylotypes among groups.

Comparison of bacteria between the groups at different phylogenetic levels was performed by using an unpaired t-test after data had been normalized to values between 0 and 1 using MGR-AST.

## Author Contributions

Conceived and designed the experiments: MCC EAV HRS JSW. Performed the experiments: MCC LGA AS. Analyzed the data: MCC PTK JSW. Contributed reagents/materials/analysis tools: LGA JSW. Wrote the paper: MCC. Critically reviewed the manuscript: MCC LGA EAV HRS AS PTK JSW.

## References

- Suau A, Bonnet R, Sutren M, Godon JJ, Gibson GR, et al. (1999) Direct analysis of genes encoding 16S rRNA from complex communities reveals many novel molecular species within the human gut. *Appl Environ Microbiol* 65: 4799–4807.
- Argenzio RA, Southworth M, Stevens CE (1974) Sites of organic acid production and absorption in the equine gastrointestinal tract. *Am J Physiol* 226: 1043–1050.
- Glinsky MJ, Smith RM, Spiers HR, Davis CL (1976) Measurement of Volatile Fatty-Acid Production-Rates in Cecum of Pony. *Anim Sci* 42: 1465–1470.
- Al Jassim RA, Andrews FM (2009) The bacterial community of the horse gastrointestinal tract and its relation to fermentative acidosis, laminitis, colic, and stomach ulcers. *Vet Clin North Am Equine Pract* 25: 199–215.
- Chapman AM (2001) Acute diarrhea in hospitalized horses. *Vet Clin North Am Equine Pract* 25: 363–380.
- Weese JS, Staempfli HR, Prescott JF (2001) A prospective study of the roles of *Clostridium difficile* and enterotoxigenic *Clostridium perfringens* in equine diarrhoea. *Equine Vet J* 33: 403–409.
- Daly K, Stewart CS, Flint HJ, Shirazi-Beechey SP (2001) Bacterial diversity within the equine large intestine as revealed by molecular analysis of cloned 16S rRNA genes. *FEMS Microbiol. Ecol* 38: 141–151.
- Eckburg PB, Bik EM, Bernstein CN, Purdom E, Dethlefsen L, et al. (2005) Diversity of the human intestinal microbial flora. *Science* 308: 1635–1638.
- Wu GD, Lewis JD, Hoffmann C, Chen YY, Knight R, et al. (2010) Sampling and pyrosequencing methods for characterizing bacterial communities in the human gut using 16S sequence tags. *BMC Microbiol* 10: 206.
- Schloss PD, Westcott SL, Ryabin T, Hall JR, Hartmann M, et al. (2009) Introducing mothur: open-source, platform-independent, community-supported software for describing and comparing microbial communities. *Appl Environ Microbiol* 75: 7537–7541.
- Quince C, Lanzan A, Davenport RJ, Turnbaugh PJ (2011) Removing noise from pyrosequenced amplicons. *BMC Bioinformatics* 12: 38.
- Edgar RC, Haas BJ, Clemente JC, Quince C, Knight R (2011) UCHIME improves sensitivity and speed of chimera detection *Bioinformatics*. 27: 2194–2200.
- Meyer F, Paarmann D, D'Souza M, Olson R, Glass EM, et al. (2008) The metagenomics RAST server - a public resource for the automatic phylogenetic and functional analysis of metagenomes. *BMC Bioinformatics* 9: 386.
- Altschul SF, Gish W, Miller W, Myers EW, Lipman DJ (1990) Basic local alignment search tool. *J Mol Biol* 215: 403–410.
- White JR, Nagarajan N, Pop M (2009) Statistical methods for detecting differentially abundant features in clinical metagenomic samples. *PLoS Comput Biol* 5: e1000352.
- Shepherd ML, Swecker WS Jr, Jensen RV, Ponder MA (2011) Characterization of the fecal bacteria communities of forage-fed horses by pyrosequencing of 16S rRNA V4 gene amplicons. *FEMS Microbiol Lett* 326: 62–68.
- Middelbos IS, Vester Boler BM, Qu A, White BA, et al. (2010) Phylogenetic characterization of fecal microbial communities of dogs fed diets with or without supplemental dietary fiber using 454 pyrosequencing. *PLoS One* 5: e9768.
- Willing B, Vörös A, Roos S, Jones C, Jansson A, et al. (2009) Changes in faecal bacteria associated with concentrate and forage-only diets fed to horses in training. *Equine Vet J* 41: 908–914.
- Packey CD, Sartor RB (2009) Commensal bacteria, traditional and opportunistic pathogens, dysbiosis and bacterial killing in inflammatory bowel diseases. *Curr Opin Infect Dis* 22: 292–301.
- Chang JY, Antonopoulos DA, Kalra A, Tonelli A, Khalife WT, et al. (2008) Decreased diversity of the fecal microbiome in recurrent *Clostridium difficile*-associated diarrhea. *J Infect Dis* 197: 435–438.
- Jami E, Itzhak M (2012) Similarity of the ruminal bacteria across individual lactating cows. *Anaerobe*. Apr 21. [Epub ahead of print]
- Durso LM, Harhay GP, Smith TP, Bono J, DeSantis TZ, et al. (2011) Bacterial community analysis of beef cattle feedlots reveals that pen surface is distinct from feces. *Foodborne Pathog Dis* 8: 647–649.
- Frank DN, St. Amand AL, Feldman RA, Boedicker C, Harpaz N, et al. (2007) Molecular-phylogenetic characterization of microbial community imbalances in human inflammatory bowel diseases. *Proc Natl Acad Sci USA* 104: 13780–13785.
- Khoruts A, Dickved J, Jansson JK, Sadowsky MJ (2010) Changes in the composition of the human fecal microbiome after bacteriotherapy for recurrent *Clostridium difficile*-associated diarrhea. *J Clin Gastroenterol* 44: 354–360.
- Turnbaugh PJ, Hamady M, Yatsunencko T, Cantarel BL, Duncan A, et al. (2009) A core gut microbiome in obese and lean twins. *Nature* 457: 480–484.
- Chaban B, Links MG, Hill JE (2012) A molecular enrichment strategy based on *cpn60* for detection of epsilon-proteobacteria in the dog fecal microbiome. *Microb Ecol* 63: 348–357.
- Strauss J, Kaplan GG, Beck PL, Rioux K, Panaccione R, et al. (2011) Invasive potential of gut mucosa-derived *Fusobacterium nucleatum* positively correlates with IBD status of the host. *Inflamm Bowel Dis* 17: 1971–1978.
- Castellarin M, Warren RL, Freeman JD, Dreolini L, Krzywinski M, et al. (2012) *Fusobacterium nucleatum* infection is prevalent in human colorectal carcinoma. *Genome Res* 22: 299–306.
- Kostic AD, Gevers D, Pedamallu CS, Michaud M, Duke F, et al. (2012) Genomic analysis identifies association of *Fusobacterium* with colorectal carcinoma. *Genome Res* 22: 292–298.
- Swidsinski A, Dörffel Y, Loening-Baucke V, Theissig F, Rückert JC, et al. (2011) Acute appendicitis is characterized by local invasion with *Fusobacterium nucleatum/necrophorum*. *Gut* 60: 34–40.
- Ohkusa T, Okayasu I, Ogihara T, Morita K, Ogawa M, et al. (2003) Induction of experimental ulcerative colitis by *Fusobacterium varium* isolated from colonic mucosa of patients with ulcerative colitis. *Gut* 52: 79–83.
- Giguère S (2008) Bacterial pneumonia and pleuropneumonia in adult horses. In: Smith BP editor. *Large Animal Internal Medicine* 4th Edition. Mosby. Pp. 500–510.
- Frederick J, Giguère S, Sanchez LC (2009) Infectious agents detected in the feces of diarrheic foals: a retrospective study of 233 cases (2003–2008). *J Vet Intern Med* 23: 1254–1260.
- Donaldson MT, Palmer JE (1999) Prevalence of *Clostridium perfringens* enterotoxin and *Clostridium difficile* toxin A in feces of horses with diarrhea and colic. *J Am Vet Med Assoc* 215: 358–361.
- Medina-Torres CE, Weese JS, Staempfli HR (2011) Prevalence of *Clostridium difficile* in horses. *Vet Microbiol* 152: 212–215.
- Guarino A, Lo Vecchio A, Canani RB (2009) Probiotics as prevention and treatment for diarrhea. *Curr Opin Gastroenterol* 25: 18–23.
- Desrochers AM, Dolente BA, Roy MF, Boston R, Carlisle S (2005) Efficacy of *Saccharomyces boulardii* for treatment of horses with acute enterocolitis. *J Am Vet Med Assoc* 227: 954–959.
- Parraga ME, Spier SJ, Thurmond M, Hirsh D (1997) A clinical trial of probiotic administration for prevention of Salmonella shedding in the postoperative period in horses with colic. *J Vet Intern Med* 11: 36–41.
- Weese JS, Rousseau J (2005) Evaluation of *Lactobacillus pentosus* WE7 for prevention of diarrhea in neonatal foals. *J Am Vet Med Assoc* 226: 2031–2034.
- Rea MC, O'Sullivan O, Shanahan F, O'Toole PW, Stanton C, et al. (2012) *Clostridium difficile* carriage in elderly subjects and associated changes in the intestinal microbiota. *J Clin Microbiol* 50: 867–875.
- Borody TJ, Khoruts A (2011) Fecal microbiota transplantation and emerging applications. *Nat Rev Gastroenterol Hepatol* 9: 88–96.
- Kassam Z, Hundal R, Marshall JK, Lee CH (2012) Fecal Transplant via Retention Enema for Refractory or Recurrent *Clostridium difficile* Infection. *Arch Intern Med* 172: 191–193.
- Hill JE, Fernando WM, Zello GA, Tyler RT, Dahl WJ, et al. (2010) Improvement of the representation of bifidobacteria in fecal microbiota metagenomic libraries by application of the *cpn60* universal primer cocktail. *Appl Environ Microbiol* 76: 4550–4552.
